# Supplementary material for: Biocatalysis in the Recycling Landscape for Synthetic Polymers and Plastics towards Circular Textiles
Source: PubMed Central journal article supplement (PMC8518944; doi:10.1002/cssc.202002666), 2021-02-12
Supplement: CSSC-14-4028-s001.pdf [file CSSC-14-4028-s001.pdf]

# ChemSusChem

## Supporting Information

### **Biocatalysis in the Recycling Landscape for Synthetic Polymers and Plastics towards Circular Textiles**

Christina Jönsson,\* Ren Wei, Antonino Biundo, Johan Landberg, Lisa Schwarz Bour, Fabio Pezzotti, Andreea Toca, Les M. Jacques, Uwe T. Bornscheuer,\* and Per-Olof Syrén\*This publication is part of a collection of invited contributions focusing on “Chemical Upcycling of Waste Plastics”. Please visit [to view all contributions](#). © 2021 The Authors. ChemSusChem published by Wiley-VCH GmbH. This is an open access article under the terms of the Creative Commons Attribution License, which permits use, distribution and reproduction in any medium, provided the original work is properly cited.

**Table S1.** Global textile mill consumption (Mt/year). Data adapted from reference<sup>[1]</sup>.

| <b>Fiber type</b>      | <b>2000</b> | <b>2010</b> | <b>2015</b> | <b>2020</b> | <b>2025</b> | <b>2030</b> |
|------------------------|-------------|-------------|-------------|-------------|-------------|-------------|
| Wool                   | 1.455       | 1.117       | 1.132       | 1.122       | 1.153       | 1.176       |
| Cotton                 | 19.97       | 24.692      | 23.774      | 26.117      | 28.514      | 30.792      |
| Cellulose-based fibers | 2.292       | 3.605       | 5.375       | 6.509       | 8.658       | 10.408      |
| Acrylic                | 2.637       | 1.914       | 1.793       | 1.677       | 1.686       | 1.679       |
| Nylon                  | 4.044       | 3.688       | 4.107       | 5.051       | 5.739       | 6.302       |
| Polyester              | 19.345      | 37.088      | 47.783      | 59.02       | 69.81       | 82.123      |
| Polypropylene          | 2.916       | 3.58        | 4.262       | 5.332       | 6.336       | 7.582       |
| Elastane               | 0.174       | 0.414       | 0.619       | 0.845       | 1.125       | 1.4         |
| Total                  | 52.659      | 75.684      | 88.226      | 104.828     | 121.896     | 140.062     |

**Table S2.** Market share for different fiber types in textile applications [%].

| <b>Fiber type</b>       | <b>2000</b> | <b>2010</b> | <b>2015</b> | <b>2020</b> | <b>2025</b> | <b>2030</b> |
|-------------------------|-------------|-------------|-------------|-------------|-------------|-------------|
| Wool                    | 2.8         | 1.5         | 1.3         | 1.1         | 0.9         | 0.8         |
| Cotton                  | 37.9        | 32.6        | 26.9        | 24.9        | 23.4        | 22.0        |
| Cellulose-based fibers  | 4.4         | 4.8         | 6.1         | 6.2         | 7.1         | 7.4         |
| Acrylic                 | 5.0         | 2.5         | 2.0         | 1.6         | 1.4         | 1.2         |
| Nylon                   | 7.7         | 4.9         | 4.7         | 4.8         | 4.7         | 4.5         |
| Polyester               | 36.7        | 49.0        | 54.2        | 56.3        | 57.3        | 58.6        |
| Polypropylene           | 5.5         | 4.7         | 4.8         | 5.1         | 5.2         | 5.4         |
| Elastane <sup>[a]</sup> | 0.3         | 0.5         | 0.7         | 0.8         | 0.9         | 1.0         |
| Total                   | 100.0       | 100.0       | 100.0       | 100.0       | 100.0       | 100.0       |

<sup>[a]</sup> Asia has become dominant in mill consumption of elastane (as with other fibers). In 2000, Asia's market share was 48%, Greater Europe's was 24% and the America's was 28%. In 2020, Asia's forecasted market share will be 83%, Greater Europe's will be 9.5% and the America's will be 8.5%.<sup>[1]</sup>

**Table S3.** Generic overview regarding fiber categories, polymer blends and their use in different applications. The table shows some common fiber blends with an emphasis on polymers with hydrolysable links, relative abundance (%) of each fiber type and in what application they may be found. The data is synthesized from several different sources, i.e. industry dialogue and research projects, and only give a simplified overview over the complex textile material flow. However, the data give a basic understanding of the need for separation technologies enabling high value textile secondary raw material.

| Fiber category                   | Fiber type                                                   | Common product type                                              |
|----------------------------------|--------------------------------------------------------------|------------------------------------------------------------------|
| Cellulosic                       | Cotton                                                       | T-shirts, sweatshirts, bed linen                                 |
| Regenerated cellulose            | Viscose                                                      | T-shirts and tops, carpets                                       |
|                                  | Lyocell                                                      | T-shirts, bed linen                                              |
| Synthetic fiber                  | Polyester                                                    | Workwear, home textile, lining, shell                            |
|                                  | Polyamide 6                                                  | Technical textile, rainwear, sunscreens, outdoor (lining, shell) |
|                                  | Polyamide 6,6                                                | Technical applications                                           |
|                                  | Polyurethane                                                 | Synthetic leather articles and accessories                       |
| Natural fiber                    | Wool                                                         | Socks, under clothing                                            |
| Cellulose-based/synthetic blends | Cotton/polyester (polycotton)                                | Workwear, health care textile, bedsheets, sweatshirts            |
|                                  | Polyester/elastane (lower elastane content, 3-15%)           | Tops, dresses, trousers                                          |
|                                  | Polyamide/elastane (usually higher elastane content, 10-25%) | Swimwear, sportswear                                             |
|                                  | Cotton/elastane (lower elastane content, 1-5 %)              | Denim, t-shirts, sweatshirts                                     |
|                                  | Viscose/elastane (lower elastane content)                    | T-shirts, trousers                                               |
|                                  | Viscose/polyamide                                            | T-shirts, tops                                                   |
|                                  | Wool/polyamide                                               | Knitwear, sportswear                                             |
|                                  | Wool/polyamide/elastane                                      | Knitwear, sportswear                                             |

**Table S4.** World fiber demand since 1900. Data adapted from references <sup>[1]-[2]</sup>.

| <b>Year</b> | <b>Total amount of fibers produced [Mt]</b> |
|-------------|---------------------------------------------|
| 1900        | 4                                           |
| 1910        | 6                                           |
| 1920        | 7                                           |
| 1930        | 8                                           |
| 1940        | 10                                          |
| 1950        | 13                                          |
| 1960        | 20                                          |
| 1970        | 25                                          |
| 1980        | 30                                          |
| 1990        | 41                                          |
| 2000        | 53                                          |
| 2010        | 76                                          |
| 2015        | 88                                          |
| 2020        | 105                                         |
| 2025        | 122                                         |
| 2030        | 140                                         |

**Table S5.** Some existing methods for separation of complex textile materials and pre-treatment of plastics and polymers.<sup>[3]</sup>

| Technology                      | Description                                                                                                                                                                                                                                                                                                                                                       |
|---------------------------------|-------------------------------------------------------------------------------------------------------------------------------------------------------------------------------------------------------------------------------------------------------------------------------------------------------------------------------------------------------------------|
| Mechanical processing           | <p data-bbox="683 300 912 329" style="text-align: center;"><i>Mechanical recycling</i></p> <p data-bbox="810 329 1158 383">Removal of buttons, zippers and other macrostructural elements.</p> <p data-bbox="810 412 1177 517">Shredding, milling, grinding and sieving), depending on method for further processing, to generate fiber or smaller particles.</p> |
| Thermomechanical                | <p data-bbox="810 551 1166 629">Separation of components based on difference in melting temperatures.</p> <p data-bbox="810 663 1098 714">Enables compounding and injection molding.</p>                                                                                                                                                                          |
| Dissolution                     | <p data-bbox="746 797 849 826" style="text-align: center;"><i>Chemical</i></p> <p data-bbox="810 826 1150 931">Separation and removal of components that could interfere with recycling (e.g. adhesives, dyes).</p> <p data-bbox="810 965 1142 1070">Chemical micronization/restructuring by supercritical fluids to enhance accessibility of polymer chains.</p> |
| Depolymerization (e.g. by acid) | <p data-bbox="810 1128 1150 1207">Generation of shorter polymer fragments, oligomers and finally monomers.</p>                                                                                                                                                                                                                                                    |

## Supplementary note on melt filtration

**Table S6.** Material specifications and experimental setup.

| Material nr. | Material type   | Polyamide                              | Amount of Elastane [%] | Additive           | Washed           | Drying before compounding <sup>[a]</sup> | Drying before injection molding <sup>[a]</sup> | Melt filtration | Comment                                   |
|--------------|-----------------|----------------------------------------|------------------------|--------------------|------------------|------------------------------------------|------------------------------------------------|-----------------|-------------------------------------------|
| 1            | Reference       | Ultramid® 8202 HS (PA6 - virgin)       | -                      | -                  | -                | -                                        | -                                              | -               | -                                         |
| 2            | Reference       | Ultramid® 8253 HS (PA6 - virgin)       | -                      | -                  | -                | -                                        | -                                              | -               | -                                         |
| 3            | Model system    | PA6 (virgin)                           | 0                      |                    | -                | 72 h                                     | 72 h                                           | No              | -                                         |
| 4            | Model system    | PA6 (virgin)                           | 5                      |                    | -                | 72 h                                     | 72 h                                           | No              | -                                         |
| 5            | Model system    | PA6 (virgin)                           | 10                     |                    | -                | 72 h                                     | 72 h                                           | No              | -                                         |
| 6            | Model system    | PA6 (virgin)                           | 15                     |                    | -                | 72 h                                     | 72 h                                           | No              | -                                         |
| 7            | Model system    | PA6 (virgin)                           | 5                      | -                  | -                | 24 h                                     | 72 h                                           | Yes             | -                                         |
| 8            | Model system    | PA6 (virgin)                           | 10                     | -                  | -                | 24 h                                     | 72 h                                           | Yes             | -                                         |
| 9            | Consumer fabric | PA6 (post-industrial)                  | 8                      | -                  | No               | 24 h                                     | 48 h                                           | Yes             | Very problematic during IM <sup>[b]</sup> |
| 10           | Consumer fabric | PA6 (post-industrial)                  | 8                      | -                  | 5 times at 40 °C | 24 h                                     | 48 h                                           | No              | Worked well during IM                     |
| 11           | Consumer fabric | PA6 (post-industrial)                  | 8                      | -                  | 5 times at 40 °C | 24 h                                     | 48 h                                           | Yes             | Worked well during IM                     |
| 12           | Consumer fabric | PA6 (post-industrial)                  | 22                     | -                  | No               | 72 h                                     | 168 h (initial trials after 72 h failed)       | No              | -                                         |
| 13           | Reference       | Ultramid® A3K BK00464 (PA6.6 - virgin) | -                      | -                  | -                | -                                        | -                                              | -               | -                                         |
| 14           | Reference       | Ultramid® A3K R01 (PA6.6 - virgin)     | -                      | -                  | -                | -                                        | -                                              | -               | -                                         |
| 15           | Pantyhose       | PA6.6                                  | 10                     | -                  | No               | 72 h                                     | 72 h                                           | Not possible    | Minor issues during IM                    |
| 16           | Pantyhose       | PA6.6                                  | 10                     | -                  | No               | 4 h                                      | 72 h                                           | Not possible    | Minor issues during IM                    |
| 17           | Pantyhose       | PA6.6                                  | 10                     | -                  | No               | 4 h                                      | 4 h                                            | Not possible    | Problematic during IM                     |
| 18           | Pantyhose       | PA6.6                                  | 10                     | -                  | No               | 72 h                                     | 4 h                                            | Not possible    | Problematic during IM                     |
| 19           | Pantyhose       | PA6.6                                  | 10                     | 0.5 % Licomont CaV | No               | 24 h                                     | 24 h                                           | Not possible    | Worked well during IM                     |
| 20           | Pantyhose       | PA6.6                                  | 10                     | 0.1 % Addworks     | No               | 24 h                                     | 24 h                                           | Not possible    | Worked well during IM                     |

<sup>[a]</sup> Drying temperature 80 °C. <sup>[b]</sup> IM = injection molding.

**Table S7.** Mechanical properties of the different test bars generated (conditions from Table S6).

| Material nr.  | Elastic modulus [MPa] | Stress at yield [MPa] | Strain at yield [%] | Stress at break [MPa] | Strain at break [%] | Impact resistance, Charpy [kJ/m <sup>2</sup> ] | Density [g/cm <sup>3</sup> ] |
|---------------|-----------------------|-----------------------|---------------------|-----------------------|---------------------|------------------------------------------------|------------------------------|
| <b>Method</b> | ISO 527-2             | ISO 527-2             | ISO 527-2           | ISO 527-2             | ISO 527-2           | ISO 179                                        | ISO 1183-A                   |
| 1             | 2700                  | 78                    | 4                   | -                     | 25                  | 3.5                                            | 1.13                         |
| 2             | 2300                  | 60                    | 4                   | -                     | 40                  | 18                                             | 1.09                         |
| 3             | 2631±84               | 77.9±3.1              | 4.6±0.7             | 65.9±15.7             | 16.5±17.6           | -                                              | 1.13                         |
| 4             | 2586±53               | 72.3±0.2              | 5.5±0.1             | 65.5±2.5              | 23.1±6.1            | -                                              | 1.12                         |
| 5             | 2361±51               | 65.0±0.3              | 5.1±0.1             | 57.5±0.6              | 25.3±1.2            | -                                              | 1.12                         |
| 6             | 2233±70               | 58.7±0.2              | 4.8±0.1             | 51.5±1.7              | 17.3±3.4            | -                                              | 1.11                         |
| 7             | 2695±44               | 62.7±0.9              | 3.9±0.1             | 49.9±9.8              | 20.3±9.8            | 4.8±0.1                                        | 1.12                         |
| 8             | 2562±31               | 57.2±0.5              | 3.7±0.0             | 37.3±13.2             | 44.0±19.8           | 5.2±0.3                                        | 1.12                         |
| 9             | 3015±148              | -                     | -                   | 48.8±8.4              | 2.1±0.9             | -                                              | -                            |
| 10            | 3140±94               | 75.4±0.4              | 3.8±0.1             | 56.8±1.2              | 13.5±0.2            | -                                              | -                            |
| 11            | 3120±82               | -                     | -                   | 52.9±19.8             | 2.0±1.0             | -                                              | -                            |
| 12            | 2157±41               | 49.8±0.2              | 3.9±0.0             | 39.2±3.9              | 22.6±5.6            | -                                              | -                            |
| 13            | 3600                  | 87                    | 4.2                 | -                     | -                   | 5                                              | 1.13                         |
| 14            | 3000                  | 85                    | 5                   | -                     | 20                  | 5                                              | 1.14                         |
| 15            | 2912±57               | -                     | -                   | 44.0±4.4              | 1.6±0.2             | 2.1±0.6                                        | 1.13                         |
| 16            | 2913±83               | -                     | -                   | 37.8±1.6              | 1.4±0.1             | 2.2±0.6                                        | 1.14                         |
| 17            | 3030±39               | -                     | -                   | 42.2±4.2              | 1.6±0.2             | 1.4±0.1                                        | -                            |
| 18            | 3207±96               | -                     | -                   | 32.7±3.5              | 1.1±0.1             | 2.1±0.6                                        | -                            |
| 19            | 3203±115              | -                     | -                   | 45.3±9.1              | 1.5±0.4             | 2.5±0.6                                        | -                            |
| 20            | 3164±73               | -                     | -                   | 45.9±10.0             | 1.6±0.4             | 2.6±0.4                                        | -                            |

**Brief summary of results obtained:**

Comparing material 10-12 (Table S6), the importance of washing to remove processing aids is seen. The washed and unfiltered material shows significantly improved mechanical properties than the other two (Table S7), while both materials that had undergone washing had superior processing properties during injection molding.

As seen in Table S6 and S7, comparing properties for materials nr. 15-18, drying before injection molding seems more important than before compounding (both regarding mechanical properties of test bars obtained and process properties during injection molding). By adding additives (Table S6, bottom), the material properties improved greatly during the injection molding process, while the mechanical properties showed a slight improvement (Table S7).

Comparing to the respective virgin PA-grades, the washed and unfiltered consumer fabric (nr. 10) and the two pantyhose materials with additives (nr. 19 and 20) shows promising properties, both in terms of mechanical properties of test bars and processability.

**Supplementary note on rotor spinning**

The following results were obtained:

- 78 % PA6.6 – 22 % Elastane: The material disappeared in the textile tearing machine
- 93 % PA6 – 7 % Elastane: Too high abundance of contaminants including elastane to be able to rotor spin (twisted threads from other fabrics and elastane, very short fibers)
- 94 % PA6.6 – 6 % Elastane: The fibers were too long



- 95 % PA6.6 – 5 % Elastane: The fibers were long, but a short thread could be rotor spun. During the rotor spinning process one could see that part of the elastane was separated.

**Table S8.** Physiochemical properties of synthetic textile fibers shown in Figure 1, inherent reactivity of relevant chemical bonds and their susceptibility to enzymatic degradation (given as % conversion of polymer s<sup>-1</sup> and/or as rate-constants calculated from published experimental data). Experimentally determined bond dissociation energies and half-life of uncatalyzed hydrolysis of the scissile bond reflects monomeric/oligomeric substrate.

| Fiber component                   | T <sub>g</sub> (° C)                            | Scissile bond <sup>[a]</sup>                                                                                                                                                             | Available biocatalysts/ Biotechnological system                                                                                    | Rate <sup>[b]</sup>                                                                         | References |
|-----------------------------------|-------------------------------------------------|------------------------------------------------------------------------------------------------------------------------------------------------------------------------------------------|------------------------------------------------------------------------------------------------------------------------------------|---------------------------------------------------------------------------------------------|------------|
| <b><u>Carbon-carbon bonds</u></b> |                                                 |                                                                                                                                                                                          |                                                                                                                                    |                                                                                             |            |
| Polypropylene                     | -20 to 0 [c],[4]                                | 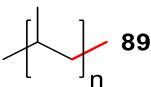 89                                                                                                     | <i>Phanerochaete chrysosporium</i> Laccase,<br><i>Engyodontium album</i> Laccase,<br><i>Pseudomonas</i> sp.<br>Alkane hydroxylase  | 10 <sup>-6</sup> % s <sup>-1</sup> [d]                                                      | [5],[6]    |
| Polystyrene                       | 95 [4]                                          |  77                                                                                                    | <i>Azotobacter beijerinckii</i><br>Hydroquinone peroxidase,<br>Mealworms ( <i>Tenebrio molitor</i> ,<br><i>Tenebrio obscurus</i> ) | 10 <sup>-5</sup> % s <sup>-1</sup> [e]                                                      | [7]        |
| <b><u>Carbamates</u></b>          |                                                 |                                                                                                                                                                                          |                                                                                                                                    |                                                                                             |            |
| Polyurethane                      | -51 to -57 [f],[8]                              |  99<br><b>t<sub>1/2</sub> = 183 000 years</b><br>(breaking of ester bond and formation of isocyanate) | Fungal/bacterial polyurethanases                                                                                                   | 10 <sup>-5</sup> % s <sup>-1</sup> [g],<br>(0.01 s <sup>-1</sup> [h])                       | [9],[10]   |
| <b><u>Ureas</u></b>               |                                                 |                                                                                                                                                                                          |                                                                                                                                    |                                                                                             |            |
| Urea                              | -                                               |  96<br><b>t<sub>1/2</sub> = 1800 years</b>                                                            | Ureas                                                                                                                              | 3500 s <sup>-1</sup> [i]                                                                    | [11]       |
| <b><u>Polyamides</u></b>          |                                                 |                                                                                                                                                                                          |                                                                                                                                    |                                                                                             |            |
| Polyamide (Nylon)                 | 53 (nylon 6),<br>57 (nylon 6,6) <sup>[12]</sup> |  99<br><b>t<sub>1/2</sub> = 400 years</b>                                                             | <i>Agromyces</i> sp.<br>Nylon hydrolase,<br><i>Bjerkandera. adusta</i><br>Manganese peroxidase                                     | 10 <sup>-4</sup> [j] - 10 <sup>-6</sup> [k] % s <sup>-1</sup><br>(0.06 s <sup>-1</sup> [l]) | [13],[14]  |

| <b><u>Polyesters</u></b>      |                         |                                                                                                                                            |                                          |                                                                                                                                                                                                             |                        |
|-------------------------------|-------------------------|--------------------------------------------------------------------------------------------------------------------------------------------|------------------------------------------|-------------------------------------------------------------------------------------------------------------------------------------------------------------------------------------------------------------|------------------------|
| Polyester (PET)               | 75 [15]                 | 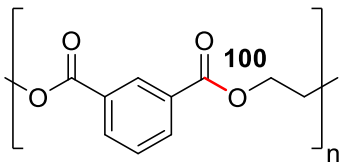 <p><math>t_{1/2} = 4 \text{ years}</math></p>            | PETases,<br>Cutinases/poly-<br>esterases | $10^{-2} \% \text{ s}^{-1}$ [i],<br>$0.1 \text{ s}^{-1}$<br>$(0.004 \text{ s}^{-1})$ [m],<br>$4 \text{ s}^{-1}$ (0.02<br>$\text{s}^{-1})$ [n]                                                               | [16]                   |
| <b><u>Polysaccharides</u></b> |                         |                                                                                                                                            |                                          |                                                                                                                                                                                                             |                        |
| Cotton                        | 200–<br>250<br>[17],[o] |  <p><math>t_{1/2} = 5 \cdot 10^6 \text{ years}</math></p> | Glycoside<br>hydrolases                  | $10^{-3} \% \text{ s}^{-1}$ [p]<br>-<br>$10^{-2} \% \text{ s}^{-1}$ [q]<br>(correspond<br>ing to $0.1 \text{ s}^{-1}$<br>)<br>[18]<br>[19],[16h, 20]<br>(Pre-treated<br>cellulose,<br>$32 \text{ s}^{-1}$ ) | [18]<br>[19],[16h, 20] |

[a] Scissile bond high-lighted in red with bond dissociation energy<sup>[21]</sup> given in kcal/mol. For cotton, the bond dissociation energy is represented by a glycosidic ether bond due to lack of experimental data. Experimental data for carbamates was not available as well. Half-life of uncatalyzed hydrolysis reactions are given at 25 °C for the relevant scissile bond [22] (excluding polyolefins for which hydrolysis mechanisms do not operate). [b] Given as conversion of polymeric substrate to monomers or metabolized products. Rate constants are given within brackets, where accessible from experimental data. See Materials and methods for details. [c] Depending on the tacticity. [d] Data for composting of polyethylene at 37 °C. [e] Consumption at 25 °C analyzed by weight loss, depolymerization in insect gut demonstrated. [f] Depending on the chain extender units. [g] When using polyester polyurethane as a sole carbon source to sustain fungal growth (at 25 °C). [h] Data for purified protein at room temperature. [i] Data for monomeric urea and utilizing purified protein at 37 °C. [j] Data for degradation of powdered nylon 6,6 using purified nylon hydrolase (data given at 60 °C). [k] Data for degradation of Nylon 6 fibers by *B. adusta* at 30 °C. [l] Depolymerization of amorphous nanoparticles at 37 °C. [m] For depolymerization of low-crystalline PET catalyzed by *H. insolens* cutinase at 70 °C. Activity for PET with 35% crystallinity were two-orders of magnitude lower and given within brackets. [n] Kinetic data for semi-crystalline PET depolymerized by an engineered variant of *I. sakaiensis* PETase at 37 °C. [16h] Corresponding data for high-crystalline PET is given in brackets (at a temperature of 40 °C). [o] Depending on the actual cellulose-based polymer, its composition in terms of crystallinity index and degree of polymerization. [p] Data for degradation of northern bleached softwood Kraft cellulose fibers given at 50 °C. [q] Data for degradation of crystalline  $\beta$ -chitin at 37 °C.

### Supplementary Note on Enzymatic conversions

It is interesting to note that conversion of more resilient polymers, including polyolefins and polyamides, converge to polymer conversions of around  $10^{-4}$ - $10^{-6} \% \text{ s}^{-1}$ , independent of the system under study (Table S8). There is no clear relationship between bond dissociation energies and half-life associated with uncatalyzed hydrolysis of the relevant bond type; a fact which is perhaps well illustrated by the aromatic ester bond (Table S8).

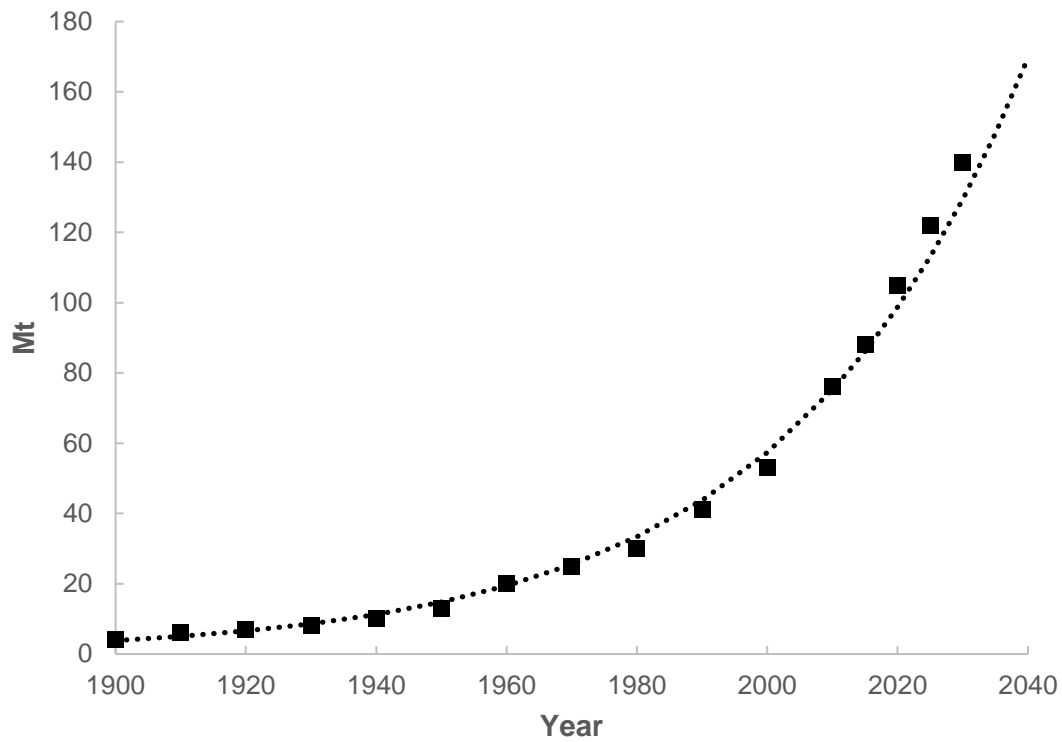

**Figure S1.** World fiber demand since 1900 and future prognosis under a business as usual scenario. Data adapted from references <sup>[1]-[2]</sup> and based on information provided by industrial partners. The dotted line corresponds to fitting of the data to an exponential function using non-linear regression, in order to calculate total production volumes by integration.  $y = 1.6295 \cdot 10^{-22} \cdot e^{0.027109x}$ ,  $R^2 = 0.9944$ .

## Data collection and Survey

Questions were exposed via a Google survey to Nordic textile brands via the Swedish Chemicals Group at RISE<sup>†</sup>. The number of answers were about 20 and an overview of the questionnaire including a summary of the answers is presented below.

| <b>Question</b>                                             | <b>Summary of answers</b>                                                                                                                                                                                                                                                                   |
|-------------------------------------------------------------|---------------------------------------------------------------------------------------------------------------------------------------------------------------------------------------------------------------------------------------------------------------------------------------------|
| "Do you use any fiber blends with elastane content?"        | 75% of incoming answers was yes                                                                                                                                                                                                                                                             |
| "If yes, what kind of mix (e.g. polyester with elastane)?"  | Polyester, PA, Wool, Cotton                                                                                                                                                                                                                                                                 |
| "And in what percentage of elastane?"                       | The range of percentage of elastane according to the questionnaire is between 2-30%. The higher end of the range of elastane (approx. 20%) content is used in polyamide fabrics, for example swim wear. In the lower range it was stated that polyester-elastane mixtures were most common. |
| "Do you source any recycled material?"                      | All incoming answers was yes                                                                                                                                                                                                                                                                |
| "What type of recycled fibers do you source?"               | Both pre- and post- consumer waste. Mainly food packaging material (e.g. PET bottles)                                                                                                                                                                                                       |
| "Are the materials certified?"                              | All incoming answers was yes:<br>By GRS or U TRUST certificate (REPREVE)                                                                                                                                                                                                                    |
| "Do you recycle any production waste, i.e., pre consumer?", | 60% of the incoming answers was yes                                                                                                                                                                                                                                                         |
| "If yes, what material?"                                    | Cotton, in one case PA                                                                                                                                                                                                                                                                      |

<sup>†</sup> <https://www.ri.se/en/what-we-do/networks/chemicals-group>

## Supplementary References

- [1] Textile Fibres Global Supply Demand Forecast to 2030. **2019**. Wood Mackenzie.
- [2] J. Mills, in *Tecnon OrbiChem presentation at Association Française Cotonnière (AFCOT), Deauville, France, 6 October 2011.*, **2011**.
- [3] I I. Vollmer, M. J. F. Jenks, M. C. P. Roelands, R. J. White, T. van Harmelen, P. de Wild, G. P. van der Laan, F. Meirer, J. T. F. Keurentjes, B. M. Weckhuysen, *Angew. Chem., Int. Ed.* **2020**, *59*, 15402-15423.
- [4] C. E. Wilkes, J. W. Summers, C. A. Daniels, M. T. Berard, *PVC Handbook*, Hanser, **2005**.
- [5] D. Jeyakumar, J. Chirsteen, M. Doble, *Bioresour. Technol.* **2013**, *148*, 78-85.
- [6] M. G. Yoon, H. J. Jeon, M. N. Kim, *J. Biorem. Biodegrad.* **2012**, *3*, 145.
- [7] a) K. Nakamiya, G. Sakasita, T. Ooi, S. Kinoshita, *J. Ferment. Bioeng.* **1997**, *84*, 480-482; b) S. S. Yang, A. M. Brandon, D. F. Xing, J. Yang, J. W. Pang, C. S. Criddle, N. Q. Ren, W. M. Wu, *IOP Conference Series: Earth and Environmental Science* **2018**, *150*; c) B. Y. Peng, Y. Su, Z. Chen, J. Chen, X. Zhou, M. E. Benbow, C. S. Criddle, W. M. Wu, Y. Zhang, *Environ. Sci. Technol.* **2019**, *53*, 5256-5265.
- [8] E. Orgilés-Calpena, F. Arán-Aís, A. M. Torró-Palau, C. Orgilés-Barceló, *Prog. Rubber. Plast. Re.* **2011**, *27*, 145-160
- [9] J. R. Russell, J. Huang, P. Anand, K. Kucera, A. G. Sandoval, K. W. Dantzler, D. Hickman, J. Jee, F. M. Kimovec, D. Koppstein, D. H. Marks, P. A. Mittermiller, S. J. Núñez, M. Santiago, M. A. Townes, M. Vishnevetsky, N. E. Williams, M. P. N. Vargas, L.-A. Boulanger, C. Bascom-Slack, S. A. Strobel, *Appl. Environ. Microbiol.* **2011**, *77*, 6076-6084.
- [10] a) J. Schmidt, R. Wei, T. Oeser, L. A. Dedavid E Silva, D. Breite, A. Schulze, W. Zimmermann, *Polymers* **2017**, *9*, 65; b) N. Bittner, H. Nefzger, G. Behnken, G. Jaeger, S. Behnken, L. Reisky, Covestro Deutschland AG, Germany . **2020**, EP3587570A1.
- [11] B. Krajewska, *J. Mol. Catal. B: Enz.* **2009**, *59*, 9-21.
- [12] R. Greco, L. Nicolais, *Polymer* **1976**, *17*, 1049-1053.
- [13] K. Nagai, K. Iida, K. Shimizu, R. Kinugasa, M. Izumi, D.-i. Kato, M. Takeo, K. Mochiji, S. Negoro, *Appl. Microbiol. Biotechnol.* **2014**, *98*, 8751-8761.
- [14] J. Friedrich, P. Zalar, M. Mohorčič, U. Klun, A. Kržan, *Chemosphere* **2007**, *67*, 2089-2095.
- [15] R.-J. Müller, H. Schrader, J. Profe, K. Dresler, W.-D. Deckwer, *Macromol. Rapid Commun.* **2005**, *26*, 1400-1405.
- [16] a) Å. M. Ronkvist, W. Xie, W. Lu, R. A. Gross, *Macromolecules* **2009**, *42*, 5128-5138; b) H. P. Austin, M. D. Allen, B. S. Donohoe, N. A. Rorrer, F. L. Kearns, R. L. Silveira, B. C. Pollard, G. Dominick, R. Duman, K. El Omari, V. Mykhaylyk, A. Wagner, W. E. Michener, A. Amore, M. S. Skaf, M. F. Crowley, A. W. Thorne, C. W. Johnson, H. L. Woodcock, J. E. McGeehan, G. T. Beckham, *Proc. Natl. Acad. Sci. U S A* **2018**, *115*, E4350-E4357; c) S. Yoshida, K. Hiraga, T. Takehana, I. Taniguchi, H. Yamaji, Y. Maeda, K. Toyohara, K. Miyamoto, Y. Kimura, K. Oda, *Science* **2016**, *351*, 1196-1199; d) M. Furukawa, N. Kawakami, A. Tomizawa, K. Miyamoto, *Sci. Rep.* **2019**, *9*, 16038; e) R. Wei, D. Breite, C. Song, D. Gräsing, T. Ploss, P. Hille, R. Schwerdtfeger, J. Matysik, A. Schulze, W. Zimmermann, *Adv. Sci.* **2019**, *6*, 1900491; f) R. Wei, C. Song, D. Gräsing, T. Schneider, P. Bielytskyi, D. Böttcher, J. Matysik, U. T. Bornscheuer, W. Zimmermann, *Nat. Commun.* **2019**, *10*, 5581; g) V. Tournier, C. M. Topham, A. Gilles, B. David, C. Folgoas, E. Moya-Leclair, E. Kamionka, M. L. Desrousseaux, H. Texier, S. Gavalda, M. Cot, E. Guémard, M. Dalibey, J. Nomme, G. Cioci, S. Barbe, M. Chateau, I. André, S. Duquesne, A. Marty, *Nature* **2020**, *580*, 216-219; h) Y. Cui, Y. Chen, X. Liu, S. Dong, Y. e. Tian, Y. Qiao, J. Han, C. Li, X. Han, W. Liu, Q. Chen, W. Du, S. Tang, H. Xiang, H. Liu, B. Wu, *bioRxiv* **2019**, 787069.
- [17] J. KubÁT, C. Pattyranie, *Nature* **1967**, *215*, 390-391.
- [18] A. Vasconcelos, A. Cavaco-Paulo, *Cellulose* **2006**, *13*, 611-618.
- [19] a) V. Novy, K. Aïssa, F. Nielsen, S. K. Straus, P. Ciesielski, C. G. Hunt, J. Saddler, *Proc. Natl. Acad. Sci. U S A* **2019**, *116*, 22545-22551; b) G. Vaaje-Kolstad, B. Westereng, S. J. Horn, Z. Liu, H. Zhai, M. Sørlie, V. G. H. Eijsink, *Science* **2010**, *330*, 219-222.
- [20] M. Schüle, *J. Biotechnol.* **1997**, *57*, 71-81.
- [21] a) S. J. Blanksby, G. B. Ellison, *Acc. Chem. Res.* **2003**, *36*, 255-263; b) Y.-R. Luo, *Handbook of Bond Dissociation Energies in Organic Compounds*, 1 ed., CRC Press, **2002**; c) I. I. Marochkin, O. V. Dorofeeva, *Comput. Theor. Chem.* **2012**, *991*, 182-191.
- [22] a) R. Wolfenden, *Annu. Rev. Biochem.* **2012**, *80*, 645-667; b) T. Hentschel, H. Munstedt, *Polymer* **2001**, *42*, 3195-3203
